# Supplementary material for: Composition of Pinot Noir Wine from Grapevine Red Blotch Disease-Infected Vines Managed with Exogenous Abscisic Acid Applications
Source: MDPI journal article supplement (doi:10.3390/molecules27144520), 2022-07-15
Supplement: s1 [file molecules-1766893-supplementary.pdf › molecules-1766893-supplementary.pdf]

**Table S1.** Compounds annotation of the grapevine red blotch associated wines under ABA vine treatment with high resolution mass spectrometry.

| Accepted Description         | <i>m/z</i> | Retention<br>time (min) | Adducts                   | Formula    | Score | Fragmentation<br>Score | Mass Error<br>(ppm) | Isotope<br>Similarity |
|------------------------------|------------|-------------------------|---------------------------|------------|-------|------------------------|---------------------|-----------------------|
| <i>Alkaloid</i>              |            |                         |                           |            |       |                        |                     |                       |
| 2-Hydroxyquinoline           | 146.0592   | 12.6                    | M+H                       | C9H7NO     | 54.7  | 86.4                   | -5.9                | 94                    |
| Norharmane                   | 191.0563   | 6.3                     | M+Na                      | C11H8N2    | 35.7  | 0                      | -9.8                | 89                    |
| Trigonelline                 | 138.0543   | 9.2                     | M+H                       | C7H7NO2    | 56.2  | 86.8                   | -5                  | 99.7                  |
| <i>Amino</i>                 |            |                         |                           |            |       |                        |                     |                       |
| Choline                      | 104.1063   | 5.4                     | M+H                       | C5H13NO    | 55.8  | 87.7                   | -6.8                | 99.1                  |
| N-Ethylacetamide             | 88.075     | 10.7                    | M+H, M+Na                 | C4H9NO     | 50    | 61.2                   | -8.2                | 97.8                  |
| <i>Amino acid</i>            |            |                         |                           |            |       |                        |                     |                       |
| Glutamic acid                | 148.0594   | 4.6                     | M+H                       | C5H9NO4    | 57.3  | 97.3                   | -6.7                | 96.6                  |
| L-Histidine                  | 156.0761   | 4.3                     | M+H                       | C6H9N3O2   | 56.6  | 95.8                   | -4.2                | 92.2                  |
| L-Isoleucine                 | 132.1011   | 6.6                     | M+H                       | C6H13NO2   | 56.9  | 92.3                   | -6.2                | 99.2                  |
| L-Proline                    | 116.0699   | 5.3                     | M+H                       | C5H9NO2    | 58.1  | 98.1                   | -6.4                | 99.7                  |
| Pyroglutamic acid            | 130.049    | 8                       | M+H                       | C5H7NO3    | 50.2  | 59.8                   | -6.4                | 98.5                  |
| Tyrosine                     | 182.0805   | 6.2                     | M+H                       | C9H11NO3   | 56.8  | 92.1                   | -4                  | 96.4                  |
| <i>Amino acid derivative</i> |            |                         |                           |            |       |                        |                     |                       |
| Carnitine                    | 162.1117   | 6                       | M+H                       | C7H16ClNO3 | 50.3  | 85.1                   | -4.6                | 71.9                  |
| Acetylcarnitine              | 204.1225   | 8.7                     | M+H                       | C9H17NO4   | 51.7  | 64.1                   | -2.7                | 97.7                  |
| Betaine                      | 118.0854   | 6.5                     | M+H, M+Na                 | C5H11NO2   | 56.5  | 91.6                   | -7                  | 98.7                  |
| Deoxycarnitine               | 146.1169   | 8.4                     | M+H                       | C7H15NO2   | 55.1  | 82.5                   | -4.7                | 98.6                  |
| Hydroxyproline               | 132.0646   | 4.7                     | M+H                       | C5H9NO3    | 55.9  | 97.7                   | -7                  | 90                    |
| Indolelactic acid            | 206.0805   | 17.5                    | M+H-H <sub>2</sub> O, M+H | C11H11NO3  | 55.9  | 88.4                   | -3.4                | 95                    |
| L-Carnitine                  | 162.1118   | 5.3                     | M+H                       | C7H15NO3   | 57.8  | 95.7                   | -4.1                | 98.3                  |
| L-Histidinol                 | 142.0968   | 3.9                     | M+H-H <sub>2</sub> O, M+H | C6H11N3O   | 56.3  | 90.7                   | -5.2                | 96.6                  |

|                        |          |      |                                                        |             |      |      |      |      |
|------------------------|----------|------|--------------------------------------------------------|-------------|------|------|------|------|
| N-Fructosyl isoleucine | 294.1541 | 7.1  | M+H-H <sub>2</sub> O, M+H,<br>M+Na                     | C12H23NO7   | 51.2 | 64.5 | -2   | 94.1 |
| Saccharopine           | 277.1391 | 4.5  | M+H-H <sub>2</sub> O, M+H,<br>M+Na                     | C11H20N2O6  | 52.8 | 69.4 | -1   | 95.8 |
| S-Adenosylmethionine   | 399.1438 | 5    | M+H                                                    | C15H22N6O5S | 57.4 | 97   | -1.9 | 92.5 |
| SerinyI-phenylalanine  | 253.1177 | 20.3 | M+H                                                    | C12H16N2O4  | 52.4 | 68.2 | -2.2 | 96.3 |
| Stachydrine            | 144.1012 | 9.4  | M+H                                                    | C7H13NO2    | 54.4 | 78.3 | -5   | 99.3 |
| Targinine              | 189.134  | 4.6  | M+H                                                    | C7H16N4O2   | 55.1 | 83.1 | -3   | 96.1 |
| Tryptophanol           | 144.0799 | 20.1 | M+H-H <sub>2</sub> O, M+H                              | C10H11NO    | 54.3 | 80.9 | -5.2 | 96.4 |
| N,N-Dimethyl-safingol  | 330.336  | 24.3 | M+H                                                    | C20H43NO2   | 52.9 | 73.8 | -1.9 | 92.8 |
| <i>Amino alcohol</i>   |          |      |                                                        |             |      |      |      |      |
| 2-Diethylaminoethanol  | 118.1219 | 30   | M+H                                                    | C6H15NO     | 51.7 | 66.5 | -6.1 | 98.9 |
| Lauryldiethanolamine   | 274.2734 | 22.7 | M+H                                                    | C16H35NO2   | 57.3 | 94.9 | -2.4 | 94.7 |
| <i>Carbohydrate</i>    |          |      |                                                        |             |      |      |      |      |
| Cellotetraose          | 689.2089 | 4.7  | M+H-H <sub>2</sub> O, M+H,<br>M+NH <sub>4</sub> , M+Na | C24H42O21   | 50.5 | 67.1 | -3.2 | 89   |
| Gentiobiose            | 365.1048 | 4.8  | M+H-H <sub>2</sub> O, M+H,<br>M+Na                     | C12H22O11   | 55.1 | 78.5 | -1.8 | 99.3 |
| Isomaltulose           | 360.149  | 4.7  | M+NH <sub>4</sub>                                      | C12H22O11   | 53.6 | 77.9 | -2.9 | 93.4 |
| Maltotriose            | 527.1568 | 4.8  | M+H-H <sub>2</sub> O,<br>M+NH <sub>4</sub> , M+Na      | C18H32O16   | 53.8 | 78.5 | -2.9 | 93.7 |
| <i>Fat</i>             |          |      |                                                        |             |      |      |      |      |
| Dihydrosphingosine     | 302.3047 | 23.9 | M+H-H <sub>2</sub> O, M+H,<br>M+Na                     | C18H39NO2   | 50   | 53.3 | -2.3 | 99.4 |
| Glycerophosphocholine  | 258.1096 | 5.3  | M+H, M+Na                                              | C8H20NO6P   | 55.8 | 82.1 | -1.8 | 98.8 |
| MG(18:0/0:0/0:0)       | 359.3144 | 26   | M+H                                                    | C21H42O4    | 54.2 | 77.8 | -3.3 | 97.2 |
| Phytosphingosine       | 318.2995 | 23.6 | M+H                                                    | C18H39NO3   | 56.7 | 87.9 | -2.4 | 98.5 |
| Sphingosine            | 300.2891 | 24   | M+H, M+Na                                              | C18H37NO2   | 50.7 | 58.5 | -2.2 | 97.6 |

|                                       |          |      |                                                     |          |      |      |      |      |
|---------------------------------------|----------|------|-----------------------------------------------------|----------|------|------|------|------|
| <b><i>Fatty acid</i></b>              |          |      |                                                     |          |      |      |      |      |
| 5,8,11-Trihydroxyoctadec-9-enoic acid | 353.2289 | 22.9 | M+NH <sub>4</sub> , M+Na                            | C18H34O5 | 50.5 | 62.1 | -2.9 | 93.9 |
| Monopalmitin                          | 353.2652 | 25.6 | M+H-H <sub>2</sub> O, M+H, M+NH <sub>4</sub> , M+Na | C19H38O4 | 51.3 | 61.6 | -3   | 98.2 |
| Dihydroxyoctadecadienoic acid         | 313.2364 | 23.9 | M+H                                                 | C18H32O4 | 52.8 | 74.1 | -3.1 | 93.8 |
| Vaccenic acid                         | 283.2628 | 26.2 | M+H-H <sub>2</sub> O, M+H                           | C18H34O2 | 51.5 | 71.2 | -1.1 | 87.7 |
| <b><i>Furan</i></b>                   |          |      |                                                     |          |      |      |      |      |
| Furaneol                              | 129.0536 | 9.3  | M+H-H <sub>2</sub> O, M+H                           | C6H8O3   | 51.3 | 69.6 | -7.9 | 95.6 |
| 2,3-Dihydrobenzofuran                 | 121.064  | 14.5 | M+H-H <sub>2</sub> O, M+H                           | C8H8O    | 56.2 | 89.3 | -6.2 | 98.9 |
| Furan                                 | 69.033   | 4.8  | M+H                                                 | C4H4O    | 50.9 | 66.4 | -7.4 | 96.2 |
| <b><i>Heterocyclic</i></b>            |          |      |                                                     |          |      |      |      |      |
| Lapidin                               | 335.2185 | 24.5 | M+H                                                 | C20H30O4 | 35.3 | 0    | -9.5 | 86.9 |
| Myristicin                            | 210.1119 | 13.6 | M+H, M+NH <sub>4</sub>                              | C11H12O3 | 38.8 | 0    | -3.1 | 97.5 |
| <b><i>Lactone</i></b>                 |          |      |                                                     |          |      |      |      |      |
| 4-Deoxytetronic acid                  | 87.0433  | 12.7 | M+H                                                 | C4H6O2   | 56.7 | 93.8 | -8.6 | 99.4 |
| Methysticin                           | 297.0718 | 22.9 | M+Na                                                | C15H14O5 | 36.5 | 0    | -5.6 | 88.9 |
| <b><i>Organic acid</i></b>            |          |      |                                                     |          |      |      |      |      |
| Pantothenic acid                      | 220.1174 | 10.4 | M+H-H <sub>2</sub> O, M+H, M+Na                     | C9H17NO5 | 55.1 | 80   | -2.7 | 98.6 |
| Absciscic acid                        | 265.1427 | 15.4 | M+H-H <sub>2</sub> O, M+H                           | C15H20O4 | 50.7 | 58.9 | -2.6 | 97.9 |
| Absciscic acid                        | 287.1247 | 21.8 | M+H-H <sub>2</sub> O, M+H, M+NH <sub>4</sub> , M+Na | C15H20O4 | 50.8 | 60   | -2.7 | 97.1 |
| 3-Indoleacrylic acid                  | 188.0699 | 11.8 | M+H, M+NH <sub>4</sub>                              | C11H9NO2 | 50.8 | 60.1 | -3.8 | 98.3 |
| Cinnamic acid                         | 166.0853 | 9.5  | M+H, M+NH <sub>4</sub>                              | C9H8O2   | 50.4 | 59.8 | -6.2 | 99.4 |
| Citric acid                           | 215.0157 | 5.6  | M+H-H <sub>2</sub> O, M+H, M+NH <sub>4</sub> , M+Na | C6H8O7   | 54   | 74.1 | -2.5 | 98.6 |

*Others*

|                           |          |      |                                    |                                                                 |      |      |      |      |
|---------------------------|----------|------|------------------------------------|-----------------------------------------------------------------|------|------|------|------|
| Butanediol                | 73.0643  | 7.5  | M+H-H <sub>2</sub> O, M+H,<br>M+Na | C <sub>4</sub> H <sub>10</sub> O <sub>2</sub>                   | 54.1 | 78.3 | -5.4 | 98.6 |
| 2,5-Dihydroxybenzaldehyde | 139.0382 | 14.5 | M+H                                | C <sub>7</sub> H <sub>6</sub> O <sub>3</sub>                    | 50.7 | 61.4 | -5.9 | 99   |
| 2-Pyrrolidinone           | 86.0593  | 4.7  | M+H                                | C <sub>4</sub> H <sub>7</sub> NO                                | 51.3 | 68.4 | -8.9 | 97.8 |
| D-Sorbitol                | 205.068  | 4.7  | M+H-H <sub>2</sub> O, M+H,<br>M+Na | C <sub>6</sub> H <sub>14</sub> O <sub>6</sub>                   | 55.7 | 84.5 | -1.2 | 95.5 |
| Glutathione               | 308.0908 | 5.4  | M+H                                | C <sub>10</sub> H <sub>17</sub> N <sub>3</sub> O <sub>6</sub> S | 50.5 | 62.6 | -0.9 | 91.1 |
| Muramic acid              | 234.0969 | 4.7  | M+H-H <sub>2</sub> O, M+H          | C <sub>9</sub> H <sub>17</sub> NO <sub>7</sub>                  | 51.2 | 59.7 | -1.2 | 97.7 |
| Syringin                  | 395.13   | 17.9 | M+Na                               | C <sub>17</sub> H <sub>24</sub> O <sub>9</sub>                  | 52.2 | 68.7 | -3.3 | 96.4 |
| Trimethylamine            | 60.0804  | 29.8 | M+H                                | C <sub>3</sub> H <sub>9</sub> N                                 | 57.7 | 99.4 | -6.3 | 96.4 |

### Phenol-anthocyanidin

|                                      |          |      |           |           |      |      |      |      |
|--------------------------------------|----------|------|-----------|-----------|------|------|------|------|
| Delphinidin                          | 303.0507 | 19.3 | M+H       | C15H10O7  | 51.4 | 65.8 | 2.6  | 94.2 |
| Malvidin                             | 331.0804 | 18.1 | M+H       | C17H14O7  | 56.5 | 91.9 | -2.4 | 93.5 |
| Malvidin 3-(6''-acetylglucoside)     | 535.1424 | 20.3 | M+H, M+Na | C25H26O13 | 50.3 | 61   | -4.2 | 95.6 |
| Malvidin 3-(6''-p-coumarylglucoside) | 639.1685 | 21.3 | M+H, M+Na | C32H30O14 | 51.7 | 68.6 | -3.6 | 94.1 |
| Malvidin 3-O-glucoside               | 493.1323 | 18.1 | M+H       | C23H24O12 | 56.1 | 90.5 | -3.6 | 94.3 |
| Peonidin 3-(6''-acetylglucoside)     | 505.132  | 20   | M+H       | C24H24O12 | 52.1 | 72.6 | -4.1 | 92.6 |
| Peonidin 3-(6''-p-coumarylglucoside) | 609.1579 | 21.1 | M+H, M+Na | C31H28O13 | 51.6 | 64.2 | -4   | 98.4 |
| Peonidin-3-O-beta-galactoside        | 463.1219 | 17.8 | M+H       | C22H22O11 | 57.5 | 93.8 | -3.5 | 97.8 |
| Petunidin 3-(6''-acetylglucoside)    | 521.127  | 19.3 | M+H       | C24H24O13 | 51.5 | 68   | -3.9 | 94.2 |

*Phenol-dihydrochalcone*

|            |          |      |      |           |      |   |      |      |
|------------|----------|------|------|-----------|------|---|------|------|
| Phlorizine | 459.1234 | 19.9 | M+Na | C21H24O10 | 37.1 | 0 | -6.4 | 92.9 |
|------------|----------|------|------|-----------|------|---|------|------|

### Phenol-flavan-3-ols

|                                 |          |      |                                    |           |      |      |      |      |
|---------------------------------|----------|------|------------------------------------|-----------|------|------|------|------|
| Epicatechin                     | 291.0856 | 16.9 | M+H-H <sub>2</sub> O, M+H,<br>M+Na | C15H14O6  | 57.9 | 94.7 | -2.5 | 97.7 |
| Catechin                        | 291.0856 | 14.5 | M+H-H <sub>2</sub> O, M+H,<br>M+Na | C15H14O6  | 54.5 | 76.4 | -2.4 | 98.7 |
| Epigallocatechin                | 459.0882 | 18.4 | M+H                                | C22H18O11 | 36.7 | 0    | -8.8 | 93.4 |
| Procyanidin B1                  | 579.1473 | 16.6 | M+H, M+Na                          | C30H26O12 | 50.7 | 65.9 | -4.1 | 92.2 |
| Procyanidin B2                  | 579.1475 | 14.3 | M+H, M+Na                          | C30H26O12 | 54.8 | 79.9 | -3.8 | 98.7 |
| Procyanidin dimer B1            | 579.1477 | 21.6 | M+H                                | C30H26O12 | 37.6 | 0    | -3.5 | 92.2 |
| Procyanidin trimer C1           | 867.2103 | 15.4 | M+H, M+Na                          | C45H38O18 | 36.9 | 0    | -3.2 | 88.5 |
| Prodelphinidin dimer B3         | 611.1391 | 9.2  | M+H                                | C30H26O14 | 36.7 | 0    | -0.7 | 84.6 |
| <i>Phenol-flavanones</i>        |          |      |                                    |           |      |      |      |      |
| Narigenin-7-O-glucoside         | 457.1089 | 20.7 | M+H-H <sub>2</sub> O, M+H,<br>M+Na | C21H22O10 | 38.4 | 0    | -3.8 | 96.5 |
| <i>Phenol-flavones</i>          |          |      |                                    |           |      |      |      |      |
| Luteolin 4'-O-glucoside         | 449.1062 | 15.5 | M+H                                | C21H20O11 | 56.5 | 93.9 | -3.7 | 93   |
| <i>Phenol-flavonols</i>         |          |      |                                    |           |      |      |      |      |
| Taxifolin_Isomer                | 305.0644 | 18.4 | M+H                                | C15H12O7  | 55.6 | 88.3 | -3.8 | 94.1 |
| Dihydrokaempferol               | 289.0699 | 20.7 | M+H                                | C15H12O6  | 54.5 | 80.9 | -2.8 | 94.9 |
| Dihydromyricetin 3-O-rhamnoside | 489.1019 | 17.5 | M+Na                               | C21H22O12 | 38.5 | 0    | 3.4  | 96.7 |
| Dihydroquercetin_isomer         | 305.0646 | 17.5 | M+H                                | C15H12O7  | 52.5 | 70.6 | -3.2 | 95.8 |
| Dihydroquercetin 3-O-rhamnoside | 473.1037 | 19.6 | M+H-H <sub>2</sub> O, M+H,<br>M+Na | C21H22O11 | 38.7 | 0    | -3.8 | 98.1 |
| Hyperoside                      | 487.0833 | 19.6 | M+H, M+Na                          | C21H20O12 | 58.2 | 96.7 | -3   | 97.9 |
| Isoquercitrine                  | 465.1012 | 13.5 | M+H, M+Na                          | C21H20O12 | 51.7 | 65.6 | -3.3 | 96.8 |
| Isorhamnetin                    | 317.0656 | 22.7 | M+H, M+Na                          | C16H12O7  | 51.2 | 66.5 | 0.2  | 89.6 |
| Isorhamnetin-3-O-glucoside      | 501.0986 | 20.7 | M+H, M+Na                          | C22H22O12 | 58.3 | 97.9 | -3.7 | 97.9 |
| Morin                           | 303.0502 | 20.4 | M+H                                | C15H10O7  | 49.1 | 50   | 1    | 96.8 |

|                              |          |      |                                    |                                                 |      |      |      |      |
|------------------------------|----------|------|------------------------------------|-------------------------------------------------|------|------|------|------|
| Myricetin-3-Galactoside      | 503.0778 | 18.5 | M+H, M+Na                          | C <sub>21</sub> H <sub>20</sub> O <sub>13</sub> | 57.7 | 97.4 | -3.8 | 95.6 |
| Quercetin                    | 303.0501 | 21.4 | M+H, M+Na                          | C <sub>15</sub> H <sub>10</sub> O <sub>7</sub>  | 56.8 | 87.5 | 0.6  | 97.3 |
| Quercetin-3-Glucuronide      | 479.0803 | 19.3 | M+H, M+Na                          | C <sub>21</sub> H <sub>18</sub> O <sub>13</sub> | 58.7 | 98.1 | -3.5 | 99.4 |
| Quercetin-3-Rhamnoside       | 471.0879 | 20.4 | M+H-H <sub>2</sub> O, M+H,<br>M+Na | C <sub>21</sub> H <sub>20</sub> O <sub>11</sub> | 56.6 | 95.6 | -4.3 | 92.5 |
| Rutine                       | 633.1401 | 19.3 | M+H, M+Na                          | C <sub>27</sub> H <sub>30</sub> O <sub>16</sub> | 52   | 84.2 | -4.1 | 80.5 |
| Taxifolin                    | 305.0645 | 19.6 | M+H-H <sub>2</sub> O, M+H          | C <sub>15</sub> H <sub>12</sub> O <sub>7</sub>  | 55.8 | 87.3 | -3.4 | 95.8 |
| <i>Phenol-other</i>          |          |      |                                    |                                                 |      |      |      |      |
| Gingerol                     | 295.1889 | 23.8 | M+H, M+Na                          | C <sub>17</sub> H <sub>26</sub> O <sub>4</sub>  | 52.8 | 81.3 | -5   | 88.3 |
| Antiarol                     | 185.0799 | 19.6 | M+H                                | C <sub>9</sub> H <sub>12</sub> O <sub>4</sub>   | 50.7 | 64.5 | -5   | 94.9 |
| Ethyl Syringate              | 249.0728 | 23   | M+H, M+Na                          | C <sub>11</sub> H <sub>14</sub> O <sub>5</sub>  | 53.7 | 78.6 | -2.4 | 92.6 |
| Syringaresinol               | 401.1557 | 21   | M+H-H <sub>2</sub> O               | C <sub>22</sub> H <sub>26</sub> O <sub>8</sub>  | 36   | 0    | -9   | 90.2 |
| Syringetine-3-glucoside      | 509.127  | 20.9 | M+H                                | C <sub>23</sub> H <sub>24</sub> O <sub>13</sub> | 56.5 | 90.2 | -3.9 | 96.9 |
| Vannilylacetone              | 195.1007 | 24.8 | M+H, M+Na                          | C <sub>11</sub> H <sub>14</sub> O <sub>3</sub>  | 56.4 | 92.9 | -4.5 | 94.1 |
| <i>Phenol-phenolic acids</i> |          |      |                                    |                                                 |      |      |      |      |
| 4,5-Dicaffeoylquinic acid    | 517.1314 | 19.7 | M+H                                | C <sub>25</sub> H <sub>24</sub> O <sub>12</sub> | 39   | 0    | -4.1 | 95   |
| 4-Coumaric acid              | 147.0433 | 18.6 | M+H-H <sub>2</sub> O, M+H          | C <sub>9</sub> H <sub>8</sub> O <sub>3</sub>    | 57.2 | 95.8 | -4.6 | 95.6 |
| Caffeoyl tartaric acid       | 335.0366 | 11.7 | M+H, M+Na                          | C <sub>13</sub> H <sub>12</sub> O <sub>9</sub>  | 39.1 | 0    | -2.5 | 98.4 |
| Coumaric acid                | 147.0433 | 14.9 | M+H-H <sub>2</sub> O               | C <sub>9</sub> H <sub>8</sub> O <sub>3</sub>    | 52   | 66.4 | -4.8 | 99   |
| p-Coumaroyl tartaric acid    | 279.047  | 4.5  | M+H-H <sub>2</sub> O               | C <sub>13</sub> H <sub>12</sub> O <sub>8</sub>  | 36.2 | 0    | -9.9 | 91.6 |
| Vanillic acid                | 186.0754 | 5.1  | M+NH <sub>4</sub>                  | C <sub>8</sub> H <sub>8</sub> O <sub>4</sub>    | 37.5 | 0    | -3.9 | 91.9 |
| <i>Phenol-stilbenes</i>      |          |      |                                    |                                                 |      |      |      |      |
| Deoxykhivorin                | 593.2736 | 28.8 | M+Na                               | C <sub>32</sub> H <sub>42</sub> O <sub>9</sub>  | 54.4 | 77.9 | 2.6  | 97.3 |
| e-Viniferin                  | 455.1473 | 20.2 | M+H                                | C <sub>28</sub> H <sub>22</sub> O <sub>6</sub>  | 37.3 | 0    | -3.6 | 90.6 |
| Resveratrol                  | 229.0852 | 21.4 | M+H                                | C <sub>14</sub> H <sub>12</sub> O <sub>3</sub>  | 56.4 | 90.4 | -3   | 95.4 |

|                           |          |      |                                  |                                                                 |      |      |      |      |
|---------------------------|----------|------|----------------------------------|-----------------------------------------------------------------|------|------|------|------|
| Resveratrol 3-O-glucoside | 413.1193 | 20.4 | M+H, M+NH <sub>4</sub> ,<br>M+Na | C <sub>20</sub> H <sub>22</sub> O <sub>8</sub>                  | 38.8 | 0    | -3.4 | 97.9 |
| Trans-piceid              | 413.1194 | 18.9 | M+H, M+Na                        | C <sub>20</sub> H <sub>22</sub> O <sub>8</sub>                  | 51.2 | 65.6 | -3.3 | 94.1 |
| <i>Purine</i>             |          |      |                                  |                                                                 |      |      |      |      |
| 2'-O-Methylguanosine      | 298.1139 | 11.2 | M+H, M+Na                        | C <sub>11</sub> H <sub>15</sub> N <sub>5</sub> O <sub>5</sub>   | 54.3 | 79.5 | -2.3 | 94.8 |
| 2-O-Methyladenosine       | 282.1191 | 13.2 | M+H                              | C <sub>11</sub> H <sub>15</sub> N <sub>5</sub> O <sub>4</sub>   | 58.7 | 97.5 | -2.2 | 98.8 |
| 5'-S-Methylthioadenosine  | 298.0961 | 16.1 | M+H                              | C <sub>11</sub> H <sub>15</sub> N <sub>5</sub> O <sub>3</sub> S | 57.3 | 95.3 | -2.5 | 94.4 |
| 7-Methylguanine           | 166.0716 | 10.3 | M+H                              | C <sub>6</sub> H <sub>7</sub> N <sub>5</sub> O                  | 56.4 | 91.6 | -4.4 | 95.6 |
| Adenine                   | 136.0609 | 7.4  | M+H                              | C <sub>5</sub> H <sub>5</sub> N <sub>5</sub>                    | 57.4 | 96.2 | -6.2 | 97.9 |
| Succinoadenosine          | 384.1143 | 11.3 | M+H, M+Na                        | C <sub>14</sub> H <sub>17</sub> N <sub>5</sub> O <sub>8</sub>   | 50.7 | 57   | -1.8 | 98.7 |
| <i>Terpenoid</i>          |          |      |                                  |                                                                 |      |      |      |      |
| Catalpol                  | 363.1251 | 7.8  | M+H                              | C <sub>15</sub> H <sub>22</sub> O <sub>10</sub>                 | 35.3 | 0    | -9.5 | 86.9 |
| Zerumbone                 | 219.1737 | 22.1 | M+H                              | C <sub>15</sub> H <sub>22</sub> O                               | 38.6 | 0    | -2.8 | 96.4 |

---
